# Supplementary material for: Metformin and Everolimus: A Promising Combination for Neuroendocrine Tumors Treatment
Source: PubMed Central journal article supplement (PMC7464161; doi:10.3390/cancers12082143), 2020-08-02
Supplement: cancers-12-02143-s001.pdf [file cancers-12-02143-s001.pdf]

# Supplementary Materials: Metformin and Everolimus: A Promising Combination for Neuroendocrine Tumors Treatment

Eleonora Vitali, Ilena Boemi, Giulia Tarantola, Sara Piccini, Alessandro Zerbi, Giulia Veronesi, Roberto Baldelli, Gherardo Mazziotti, Valeria Smioldo, Elisabetta Lavezzi, Anna Spada, Giovanna Mantovani and Andrea G. Lania

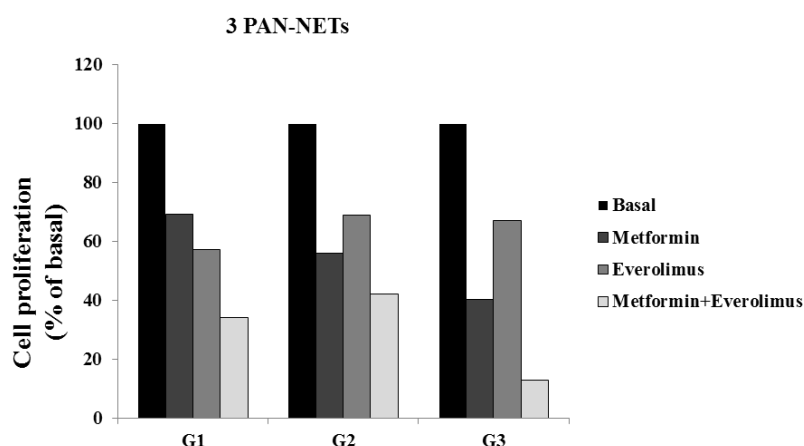

**Figure S1.** Cell proliferation of three PA-NETs. The graph represents the effect of metformin (10 mM) and everolimus (10 nM) on cell proliferation of three different PAN-NETs (G1-G2-G3).

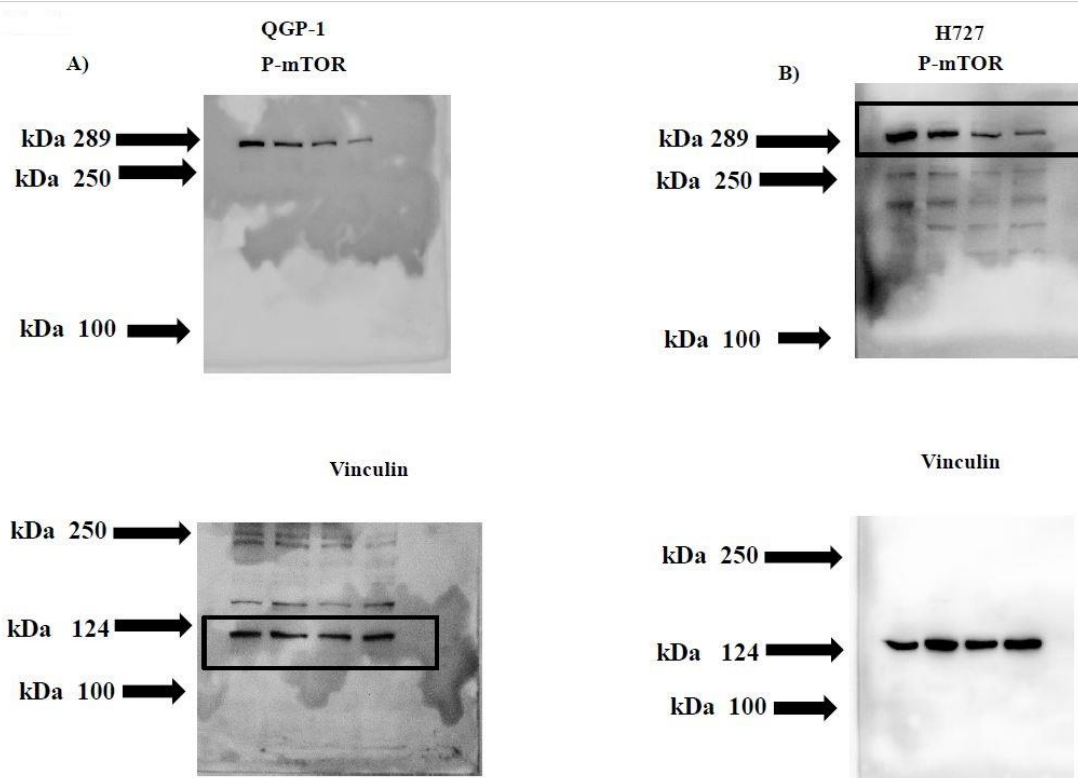

**Figure S2.** Unprocessed images for WB results (P mTOR and Vinculin) of QGP 1 and H727 cells, corresponding to the Figures 5A and 5B.

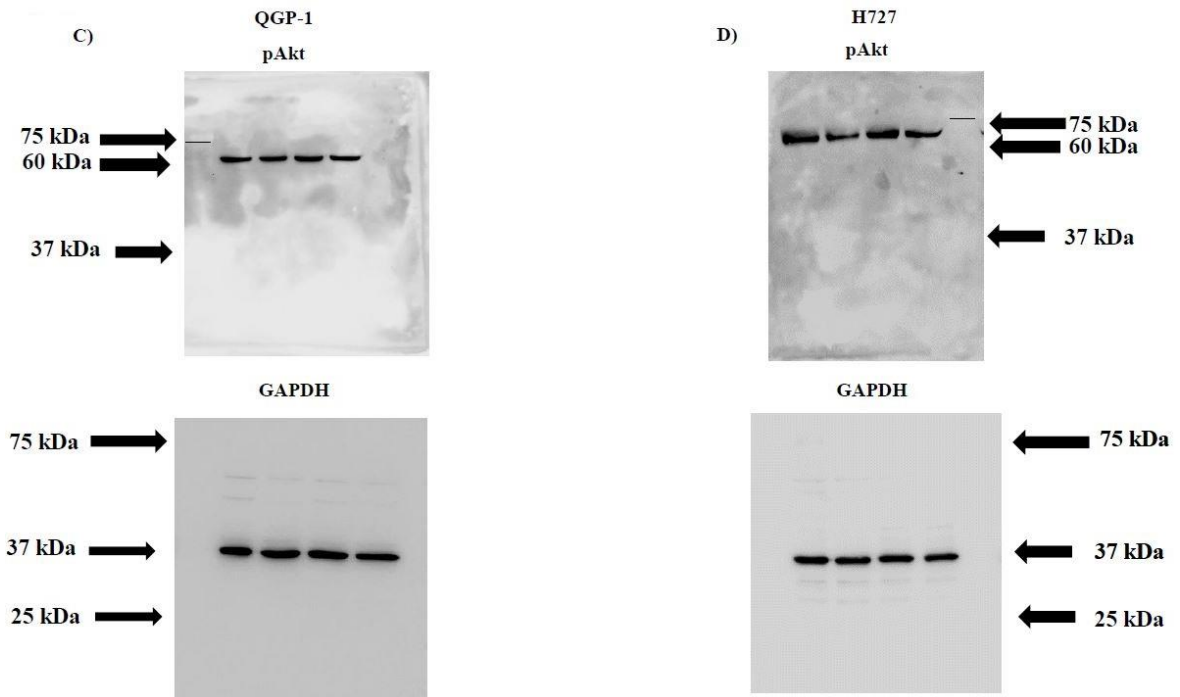

**Figure S3.** Unprocessed images for WB results (pAkt and GAPDH) of QGP-1 and H727 cells, corresponding to the Figures 5C and 5D.

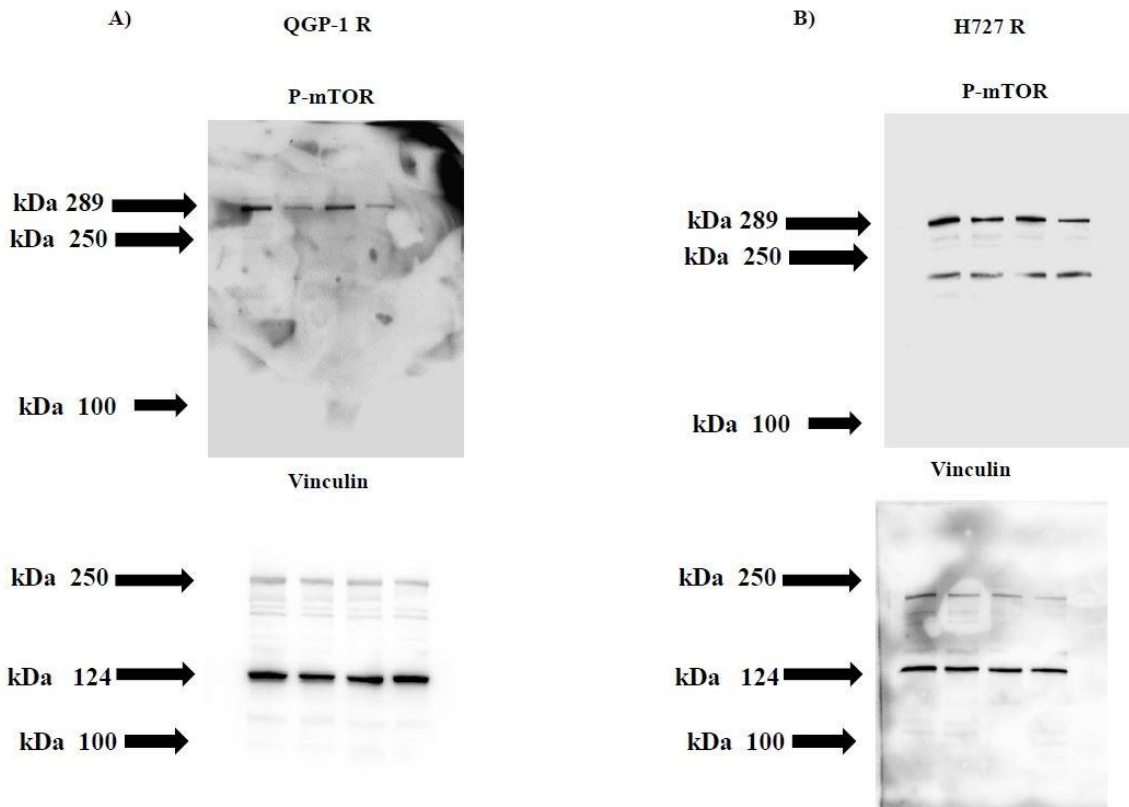

**Figure S4.** Unprocessed images for WB results (P-mTOR and Vinculin) of QGP-1 R and H727 R cells, corresponding to the Figures 7A and 7B.

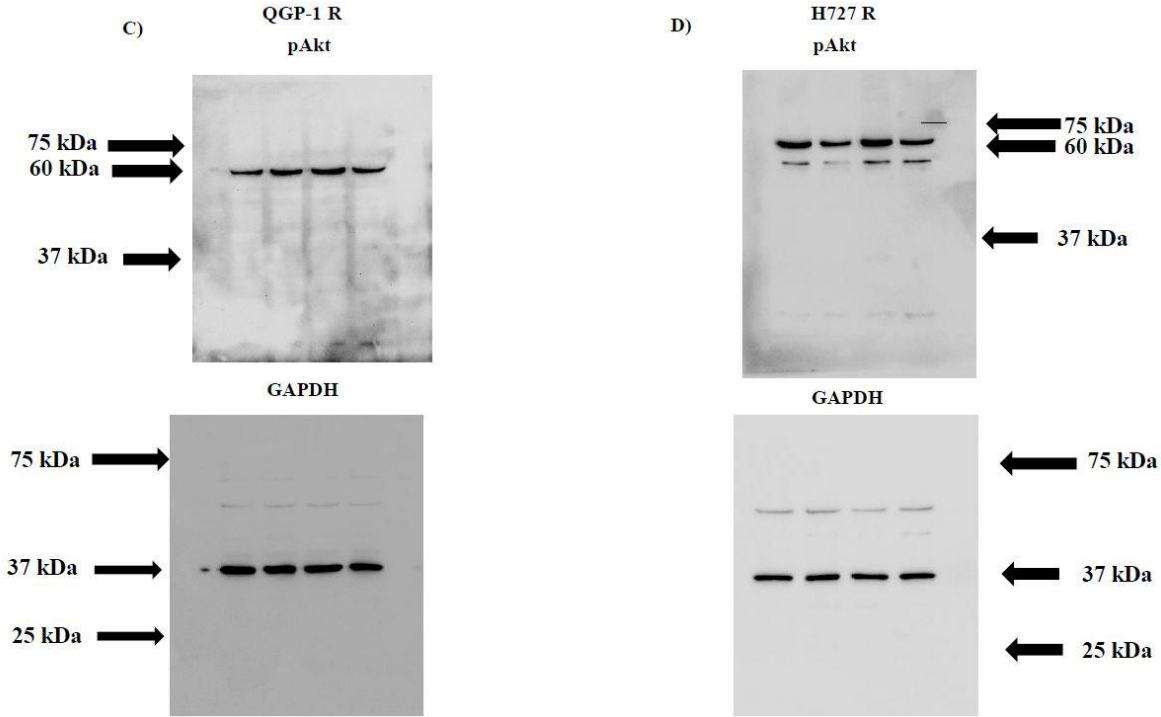

**Figure S5.** Unprocessed images for WB results (pAkt and GAPDH) of QGP-1 R and H727 cells, corresponding to the Figures 7C and 7D.

**Table S1.** Pathological Findings of PAN-NETs and PNTs included in the study.

| Case Number | Diagnosis   | Sex | Age | Grade | Ki-67 % | IHC                                        | Location                  | Stage at Diagnosis | Medical Treatments Before Surgery |
|-------------|-------------|-----|-----|-------|---------|--------------------------------------------|---------------------------|--------------------|-----------------------------------|
| 1           | PAN-NET     | F   | 60  | G2    | 7       | CgA (+), synaptophysin (+), CD56 (+, weak) | PANCREATIC BODY           | pT2 N0 R0          | None                              |
| 2           | PAN-NET     | F   | 34  | G3    | 30      | CgA (+), synaptophysin (+), CD56 (+)       | PANCREATIC NECK           | pT2 N1 R0          | None                              |
| 3           | PAN-NET     | F   | 39  | G1    | 1       | CgA (+), synaptophysin (+), CD56 (+)       | PANCREATIC BODY           | pT3 N0 M0          | None                              |
| 4           | Typical PNT | F   | 76  | Low   | MIB1 5% | CgA (+), synaptophysin (+)                 | RIGHT LUNG, MIDDLE LOBE   | pT2a; N0           | None                              |
| 5           | Typical PNT | M   | 72  | Low   | MIB1 5% | TTF1(-), CgA (+), synaptophysin (+)        | RIGHT LUNG, MIDDLE LOBE   | pT2b; N0           | None                              |
| 6           | Typical PNT | M   | 54  | Low   | MIB1 1% | TTF1(-), CgA (+), synaptophysin (+)        | RIGHT LUNG, SUPERIOR LOBE | pT1b N0 R0         | None                              |

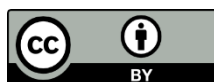

© 2020 by the authors. Licensee MDPI, Basel, Switzerland. This article is an open access article distributed under the terms and conditions of the Creative Commons Attribution (CC BY) license (<http://creativecommons.org/licenses/by/4.0/>).
